# Supplementary material for: EoE behaves as a unique Th2 disease: a narrative review
Source: PubMed Central journal article supplement — Transl Gastroenterol Hepatol. 2023 Jan 25;8:11. doi: 10.21037/tgh-22-15 (PMC9813655; doi:10.21037/tgh-22-15), 2023-01-25
Supplement: tgh-08-22-15-supplementary.pdf [file tgh-08-22-15-supplementary.pdf]

**Table S1** Search terms used in PubMed

| Database | PubMed                                                                                                                                                                                                                                                                                                                                                             |
|----------|--------------------------------------------------------------------------------------------------------------------------------------------------------------------------------------------------------------------------------------------------------------------------------------------------------------------------------------------------------------------|
| Date     | Initial search: 04/23/2020<br>Most recent update: 01/21/2022                                                                                                                                                                                                                                                                                                       |
| Strategy | #1 AND #2 AND #3 <i>Table 1</i> and 2<br>#1 AND #4 <i>Table 3</i> and 4<br>(Eosinophilic esophagitis for <i>Tables 1</i> and 3)<br>(Asthma or atopic dermatitis or chronic rhinosinusitis for <i>Tables 2</i> and 4)                                                                                                                                               |
| #1       | "Eosinophilic esophagitis" or "Asthma" or "Atopic dermatitis" or "Chronic rhinosinusitis"                                                                                                                                                                                                                                                                          |
| #2       | "Serum" or "Plasma" or "Blood"                                                                                                                                                                                                                                                                                                                                     |
| #3       | "Biomarkers" or "Interleukin-5" or "Interleukin-13" or "Eotaxin-3" or "Periostin" or "Thymic stromal lymphopoietin" or "IgG4" or "Eosinophil count" or "IgE" or "Eosinophil cationic protein" or "Eosinophil-derived neurotoxin" or "Thymus and activation-regulated chemokine" or "15(S)-HETE" or "Transforming growth factor $\beta$ 1" or "Major basic protein" |
| #4       | "Biological therapy" or "Mepolizumab" or "Reslizumab" or "Omalizumab" or "QAX576" or "RPC4046" or "Dupilumab" or "Infliximab" or "Benralizumab" or "Tezepelumab" or "Tralokinumab" or "Lebrikizumab" or "Fezakinumab" or "Nemolizumab"                                                                                                                             |
